# Supplementary material for: Automated Gleason Scoring and Tumor Quantification in Prostate Core Needle Biopsy Images Using Deep Neural Networks and Its Comparison with Pathologist-Based Assessment
Source: PubMed Central journal article supplement (PMC6966453; doi:10.3390/cancers11121860), 2019-11-25
Supplement: cancers-11-01860-s001.pdf [file cancers-11-01860-s001.pdf]

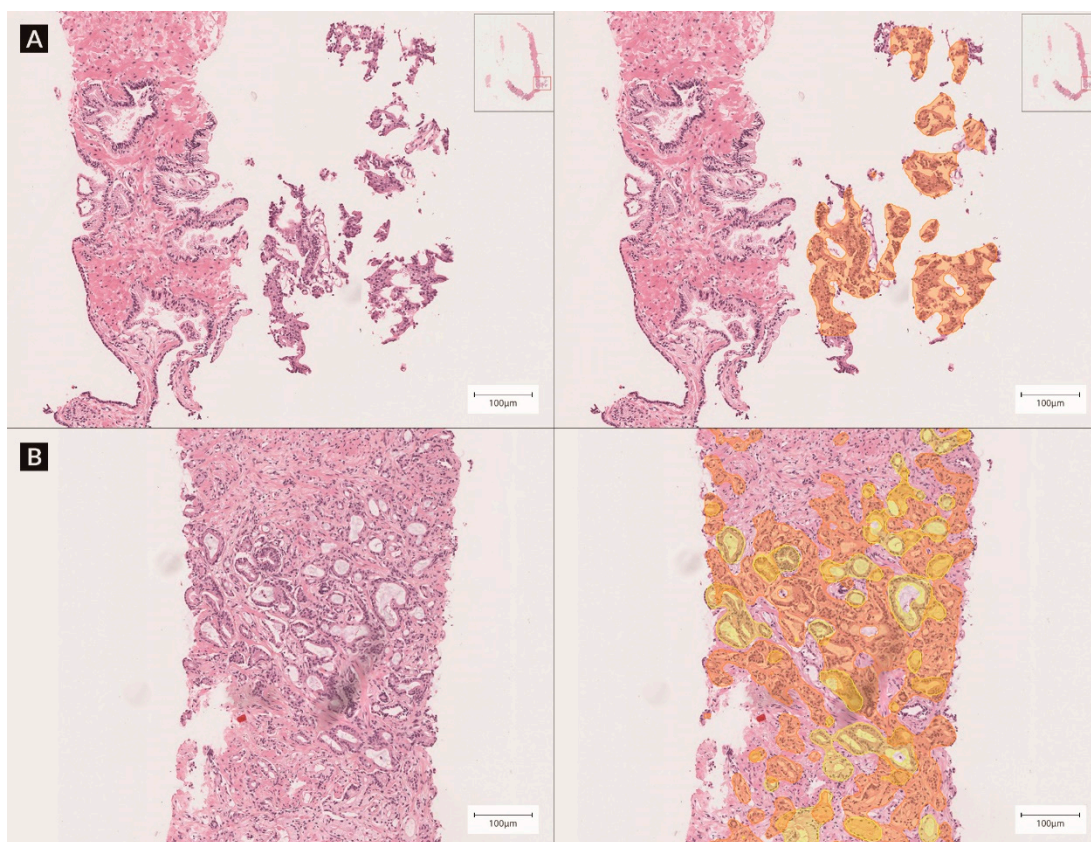

**Figure S1.** Analysis result of poor quality images by DeepDx Prostate. (A) Contains tissue fragments that have separated from the main body. (B) Contains a blurred area.

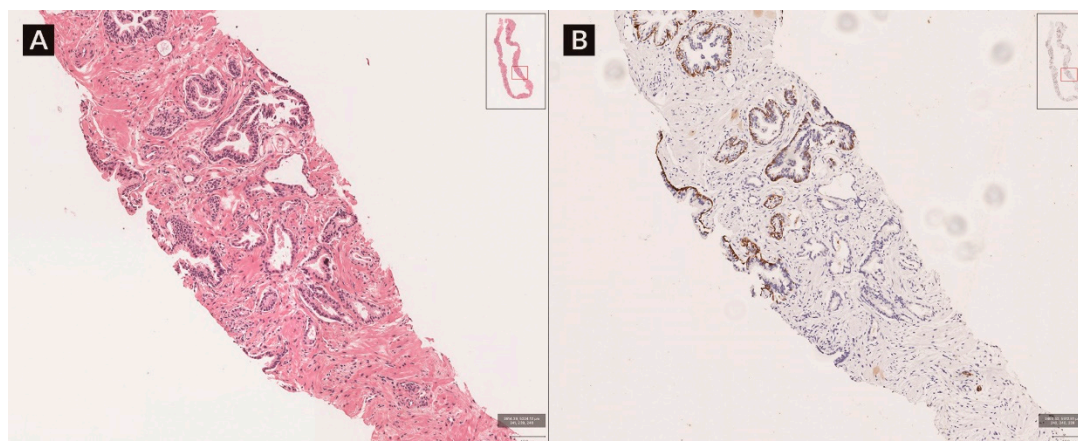

**Figure S2.** Representative image of atypical small acinar proliferation case and high molecular weight cytokeratin (HMW-CK) staining. Suspicious regions in (A) are confirmed as carcinoma in (B) through HMW-CK staining.

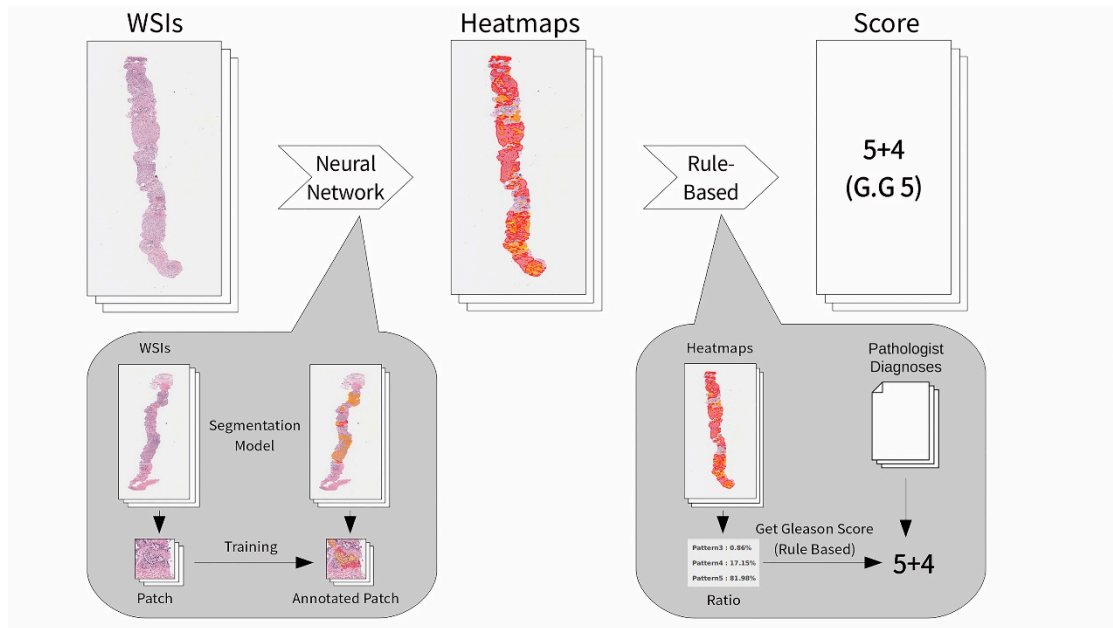

**Figure S3.** The overall algorithm workflow of our system.

**Table S1.** Diagnoses for cases with atypical small acinar proliferation (ASAP) and respective immunohistochemical (IHC) staining requests.

| No. | Original diagnoses | Pathologist 1 * | Pathologist 2 | Pathologist 3 | DeepDx Prostate | IHC Requested |
|-----|--------------------|-----------------|---------------|---------------|-----------------|---------------|
| 1   | ASAP               | benign          | benign        | ASAP          | benign          | yes           |
| 2   | ASAP               | group 1         | group 1       | ASAP          | group 1         | yes           |
| 3   | ASAP               | ASAP            | benign        | ASAP          | benign          | yes           |
| 4   | ASAP               | benign          | ASAP          | benign        | benign          |               |
| 5   | ASAP               | group 2         | group 1       | group 1       | group 2         |               |
| 6   | ASAP               | benign          | benign        | ASAP          | benign          | yes           |
| 7   | ASAP               | group 1         | group 3       | ASAP          | group 3         | yes           |
| 8   | ASAP               | benign          | benign        | ASAP          | benign          | yes           |
| 9   | ASAP               | group 1         | group 1       | group 1       | group 2         |               |
| 10  | ASAP               | benign          | benign        | benign        | benign          |               |
| 11  | ASAP               | group 1         | group 1       | group 1       | group 2         |               |

\* The genitourinary specialist.
